# Supplementary material
Source: PubMed Central journal article supplement (PMC2614796)
Supplement: 0810232105_0810232105SI.pdf [file 0810232105_0810232105SI.pdf]

# Supporting Information

Cai et al. 10.1073/pnas.0810232105

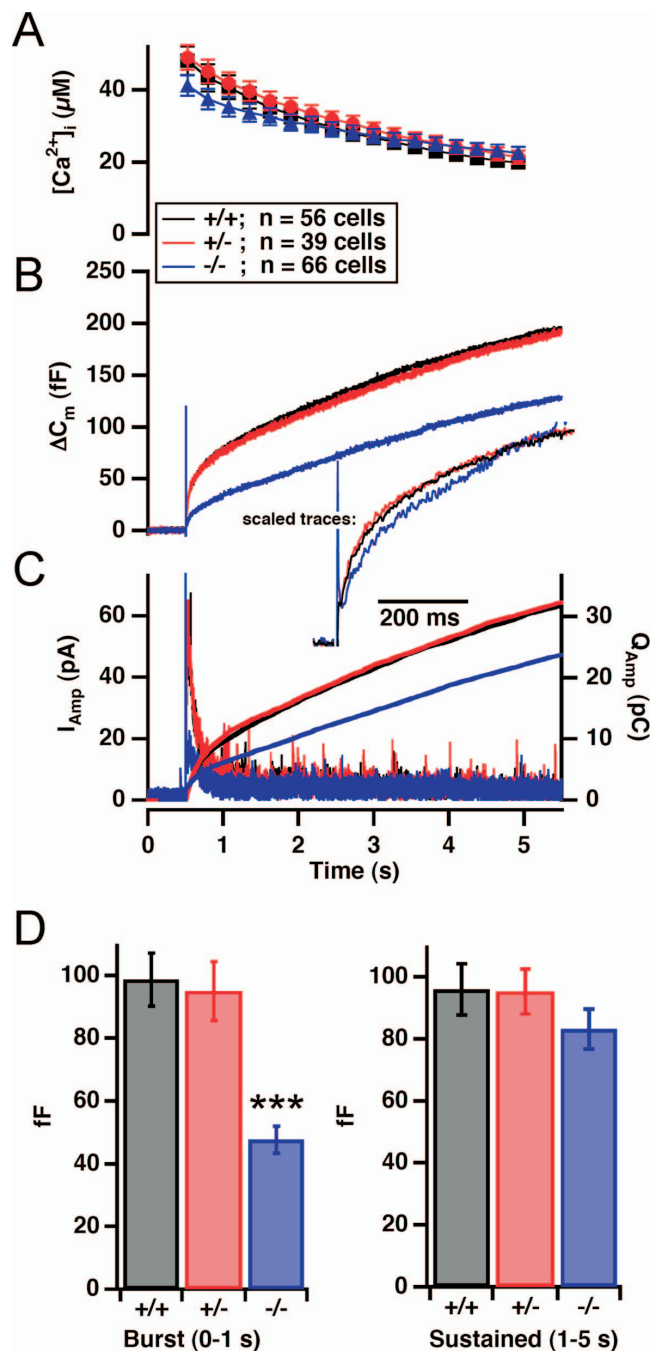

**Fig. S1.** Exocytosis triggered by photolyzing caged  $Ca^{2+}$  at  $\approx 500$  nM basal calcium concentration. (A–C) Averaged intracellular  $Ca^{2+}$  concentration (A), averaged secretion as monitored with membrane capacitance measurements (B) and with amperometry (C) from CPX II $^{-/-}$  (blue), heterozygous (red) and WT (black) cells. (Inset)  $C_m$  traces were scaled to the same amplitude at 1 sec after flash to compare the kinetics of  $C_m$  increases. The amperometric traces were also integrated to show the cumulative secretion (C). (D) Analysis of the size of burst phase (0–1 sec after flash) and sustained phase (1–5 sec after flash) by capacitance measurements. Number of cells is indicated in A. The burst size in CPX II $^{-/-}$  cells was significantly ( $***$ ,  $P < 0.001$ , one-way ANOVA with Tukey–Kramer posttest) smaller than both CPX II $^{+/-}$  and CPX II $^{+/+}$  cells.



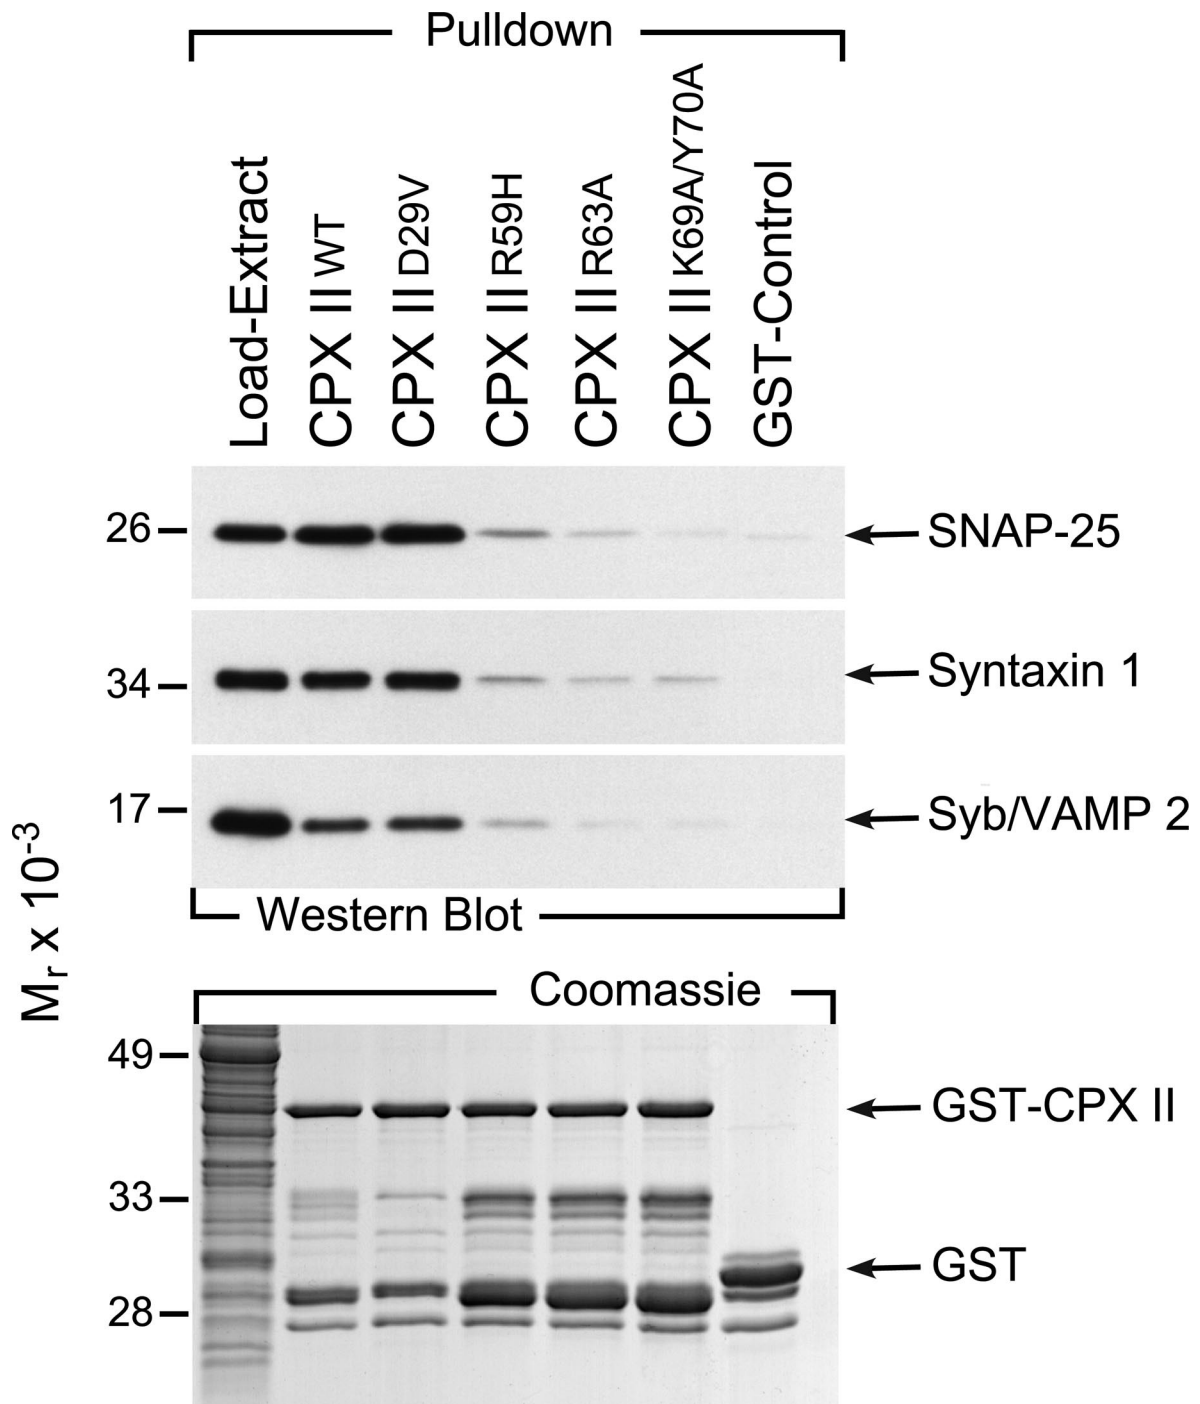

**Fig. S3.** Representative cosedimentation assay of WT GST-CPX II, mutant GST-CPX II (D29V, R59H, R63A, K69A/Y70A) fusion proteins and GST alone. GST-CPX II WT and the mutant GST-CPX II D29V show normal SNARE complex binding, while mutants GST-CPX II R59H, GST-CPX II R63A and GST-CPX II K69A/Y70A show reduced binding to the SNARE complex.
